# Supplementary material for: The Crystal Structure of Thermotoga maritima Class III Ribonucleotide Reductase Lacks a Radical Cysteine Pre-Positioned in the Active Site
Source: PubMed Central journal article supplement (PMC4493059; doi:10.1371/journal.pone.0128199), 2015-07-06

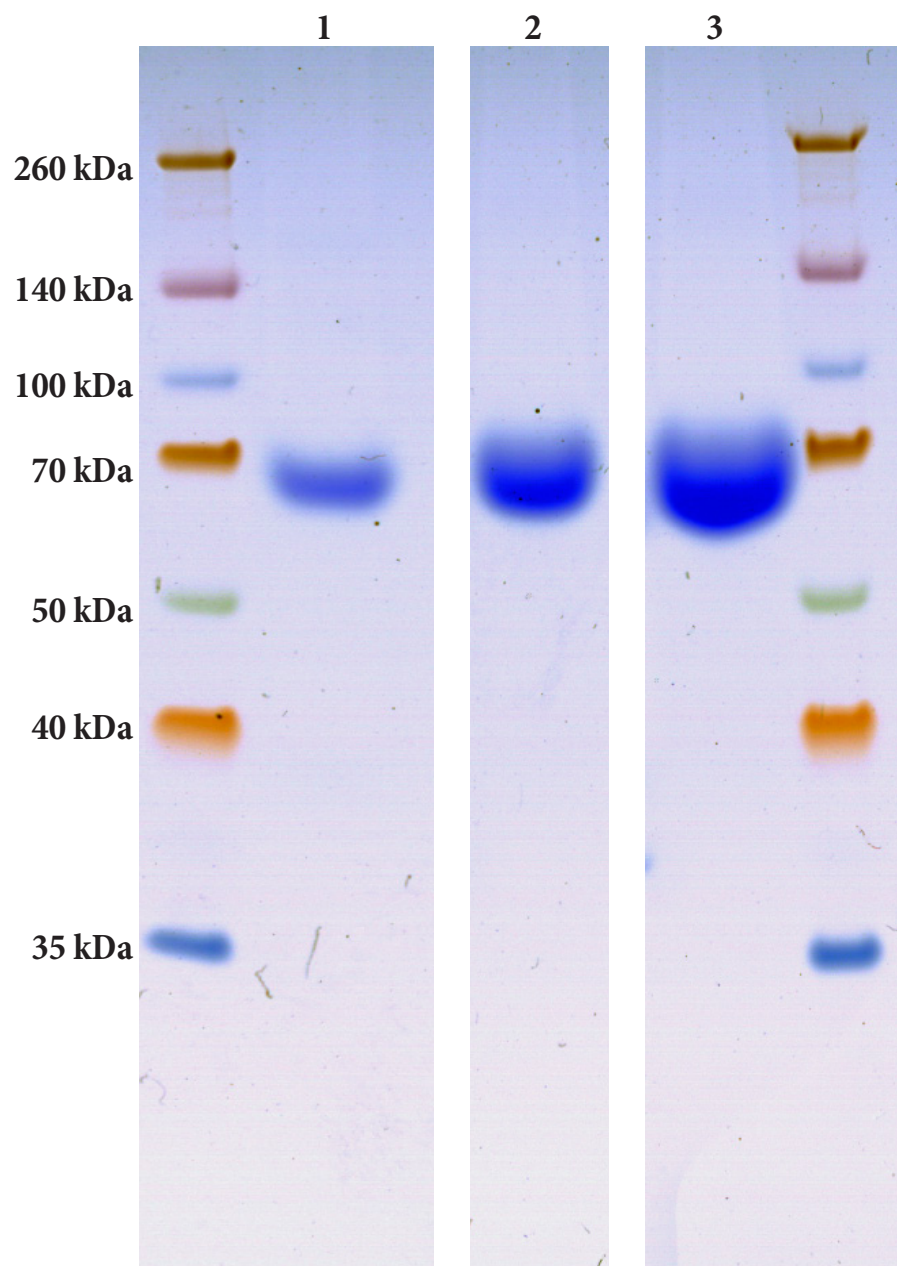

Supplement: pone.0128199.s008.pdf [file pone.0128199.s008.pdf]
